# Supplementary material for: Conversion of the Native N-Terminal Domain of TDP-43 into a Monomeric Alternative Fold with Lower Aggregation Propensity
Source: MDPI journal article supplement (doi:10.3390/molecules27134309), 2022-07-05
Supplement: s1 [file s1]

**Supporting Information for**

**Conversion of the native N-terminal domain of TDP-43**

**into a monomeric alternative fold with lower**

**aggregation propensity**

Matteo Moretti<sup>1,\*</sup>, Isabella Marzi<sup>1,\*</sup>, Cristina Cantarutti<sup>2</sup>, Mirella Vivoli Vega<sup>3</sup>, Walter Mandaliti<sup>2</sup>,  
Maria Chiara Mimmi<sup>4</sup>, Francesco Bemporad<sup>1</sup>, Alessandra Corazza<sup>2,5</sup>, Fabrizio Chiti<sup>1,^</sup>

<sup>1</sup> *Department of Experimental and Clinical Biomedical Sciences “Mario Serio”, University of Florence, FI 50134, Italy.*

<sup>2</sup> *Department of medical area, University of Udine, UD 33100, Italy.*

<sup>3</sup> *School of Biochemistry, University of Bristol, BS8 1TD Bristol, United Kingdom.*

<sup>4</sup> *Department of Molecular Medicine, University of Pavia, PV 27100, Italy.*

<sup>5</sup> *INBB, Viale Medaglie d'Oro 305, Roma 00136, Italy.*

\* These authors contributed equally to the work

<sup>^</sup> Corresponding author: Fabrizio Chiti; Viale Giovanni Battista Morgagni,50; +39 055 275 1220;  
fabrizio.chiti@unifi.it

**Table S1. Comparison between secondary structures of native TDP-43 NTD and the alternative conformation.** Comparison performed according to CSI and Talos+ analysis and NH involvement into H bonds as inferred from temperature coefficients. H stands for  $\alpha$ -helix, E for extended  $\beta$ -strand and x indicates uncertainty.

| Secondary structure comparison |                      |                      |                        |        |        |                        |        |        |
|--------------------------------|----------------------|----------------------|------------------------|--------|--------|------------------------|--------|--------|
|                                | Native<br>(PDB 5x4f) | Native<br>(PDB 6b1g) | Form A<br>(3% SB31-10) |        |        | Form B<br>(3% SB31-10) |        |        |
| Residue                        |                      |                      | CSI                    | Talos+ | H bond | CSI                    | Talos+ | H bond |
| M1                             |                      |                      | H                      |        | yes    | H                      |        | yes    |
| S2                             |                      |                      | H                      | H      | yes    | H                      | H      | yes    |
| E3                             |                      |                      | H                      | H      | yes    | H                      | H      | yes    |
| Y4                             |                      | E                    |                        | H      | x      |                        | H      | x      |
| I5                             | E                    | E                    | E                      |        | yes    | E                      |        | yes    |
| R6                             | E                    | E                    |                        |        | yes    |                        |        | yes    |
| V7                             | E                    | E                    |                        |        | yes    |                        |        | yes    |
| T8                             |                      | E                    | E                      |        | x      | E                      |        | x      |
| E9                             |                      |                      |                        |        | yes    |                        |        | yes    |
| D10                            |                      |                      |                        |        | no     |                        |        | no     |
| E11                            |                      |                      |                        |        | no     |                        |        | no     |
| N12                            |                      |                      |                        |        | no     |                        |        | no     |
| D13                            |                      |                      |                        |        | no     |                        |        | no     |
| E14                            |                      |                      |                        |        | no     |                        |        | no     |
| P15                            | -                    |                      | -                      | -      | -      | -                      | -      | -      |
| I16                            | E                    | E                    | E                      |        | no     | E                      |        | no     |
| E17                            | E                    | E                    | E                      | E      | no     | E                      | E      | no     |
| I18                            | E                    | E                    | E                      |        | no     | E                      |        | no     |
| P19                            | -                    |                      | -                      | -      | -      | -                      | -      | -      |
| S20                            |                      |                      |                        |        | x      |                        |        | x      |
| E21                            |                      |                      | -                      | -      | -      | -                      | -      | -      |
| D22                            |                      |                      |                        |        | no     |                        |        | no     |
| D23                            |                      |                      |                        |        | no     |                        |        | no     |
| G24                            |                      |                      | H                      |        | x      |                        |        | x      |
| T25                            | E                    | E                    |                        |        | yes    |                        |        | no     |
| V26                            | E                    | E                    | H                      | H      | no     |                        |        | yes    |
| L27                            | E                    | E                    | H                      | H      | x      |                        |        | no     |
| L28                            | H                    | H                    | H                      | H      | yes    | H                      | H      | no     |
| S29                            | H                    | H                    | H                      | H      | yes    | H                      | H      | yes    |
| T30                            | H                    | H                    | H                      | H      | x      | H                      | H      | x      |
| V31                            | H                    | H                    | H                      | H      | no     | H                      | H      | no     |
| T32                            | H                    | H                    | H                      | H      | no     | H                      | H      | no     |
| A33                            | H                    | H                    | H                      | H      | yes    | H                      | H      | yes    |
| Q34                            |                      | H                    |                        |        | yes    |                        |        | yes    |
| F35                            |                      | H                    |                        |        | x      |                        |        | x      |
| P36                            | -                    |                      | -                      | -      | -      | -                      | -      | -      |
| G37                            |                      |                      |                        |        | x      |                        |        | x      |
| A38                            |                      |                      |                        |        | no     |                        |        | no     |
| C39                            |                      |                      |                        |        | yes    |                        |        | yes    |
| G40                            | E                    |                      |                        |        | yes    |                        |        | yes    |
| L41                            | E                    | E                    |                        |        | no     |                        |        | no     |
| R42                            | E                    | E                    |                        |        | no     |                        |        | no     |
| Y43                            | E                    | E                    |                        |        | no     |                        |        | no     |

|     |   |   |   |   |     |   |   |     |
|-----|---|---|---|---|-----|---|---|-----|
| R44 | E | E | - | - | -   | - | - | -   |
| N45 |   |   | - | - | -   | - | - | -   |
| P46 | - |   | - | - | -   | - | - | -   |
| V47 |   |   |   |   | x   |   |   | x   |
| S48 |   |   |   |   | no  |   |   | no  |
| Q49 |   |   |   |   | no  |   |   | no  |
| C50 |   |   | - | - | -   | - | - | -   |
| M51 |   | E | - | - | -   | - | - | -   |
| R52 |   | E |   |   | yes |   |   | yes |
| G53 |   | E |   |   | no  |   |   | no  |
| V54 |   |   | E |   | no  | E |   | no  |
| R55 | E | E | - | - | -   | - | - | -   |
| L56 | E | E | - | - | -   | - | - | -   |
| V57 | E | E | E |   | x   | E |   | x   |
| E58 |   |   |   |   | yes |   |   | yes |
| G59 |   |   |   |   | no  |   |   | no  |
| I60 | E | E |   |   | no  |   |   | no  |
| L61 | E | E |   |   | no  |   |   | no  |
| H62 | E | E |   |   | no  |   |   | no  |
| A63 |   |   |   |   | no  |   |   | no  |
| P64 | - |   | - | - | -   | - | - | -   |
| D65 |   |   |   |   | no  |   |   | no  |
| A66 |   |   |   |   | no  |   |   | no  |
| G67 |   |   |   |   | yes |   |   | yes |
| W68 |   |   | H |   | no  | H |   | no  |
| G69 |   |   | H |   | no  | H |   | no  |
| N70 |   |   | H | H | x   | H | H | x   |
| L71 |   |   |   | H | yes |   | H | yes |
| V72 | E |   |   | H | yes |   | H | yes |
| Y73 | E | E |   | H | yes |   | H | yes |
| V74 | E | E |   |   | yes |   |   | yes |
| V75 | E | E |   |   | yes |   |   | yes |
| N76 | E |   |   |   | yes |   |   | yes |
| Y77 |   |   |   |   | yes |   |   | yes |

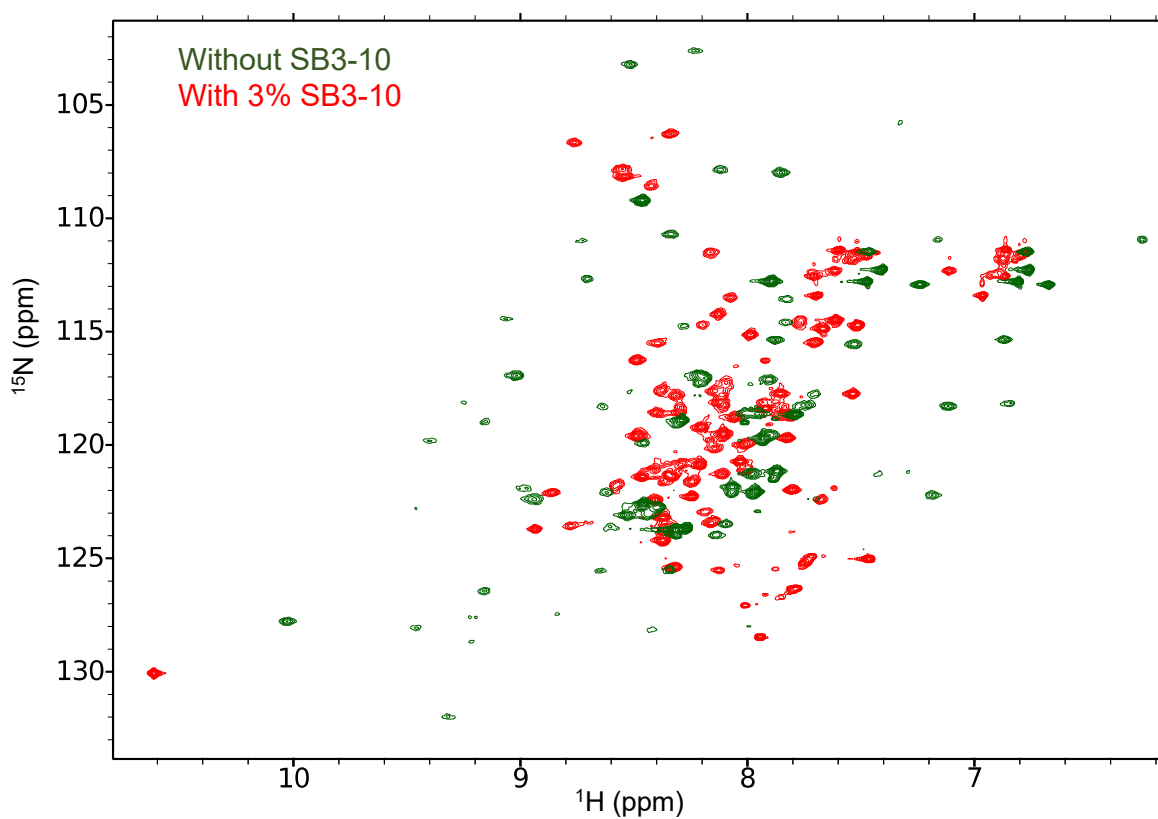

**Figure S1. Change of  $^1\text{H}$ - $^{15}\text{N}$  HSQC spectrum upon addition of 3% SB3-10.** Overlay of  $^1\text{H}$ - $^{15}\text{N}$  HSQC spectra of TDP-43 NTD recorded at 500 MHz and 25 °C in absence (green) and presence (red) of 3% (w/v) SB3-10. The superimposition of the two spectra clearly shows the reduced spectral dispersion in the presence of 3% SB3-10.

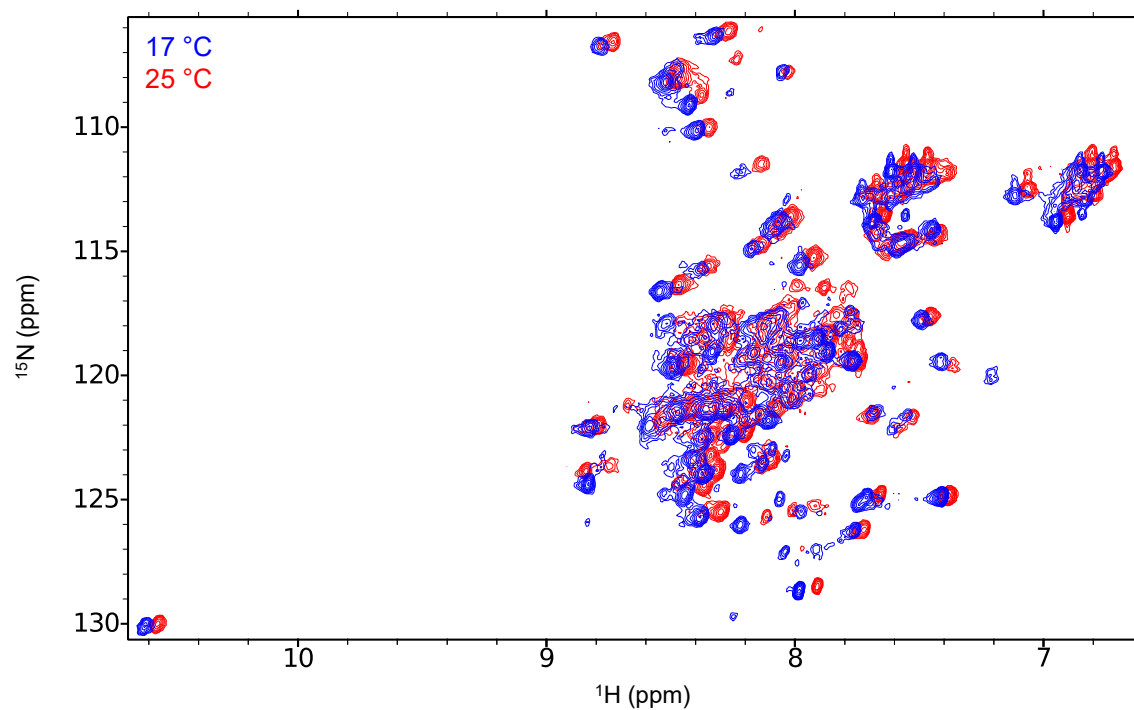

**Figure S2. Change of  $^1\text{H}$ - $^{15}\text{N}$  HSQC spectrum upon temperature decrease.** Overlay of  $^1\text{H}$ - $^{15}\text{N}$  HSQC spectra of TDP-43 NTD recorded at 700 MHz at 25 °C (red) and 17 °C (blue) in the presence of 3% (w/v) SB3-10. The superimposition of the two spectra shows the increase in the number of backbone amide peaks at lower temperature.

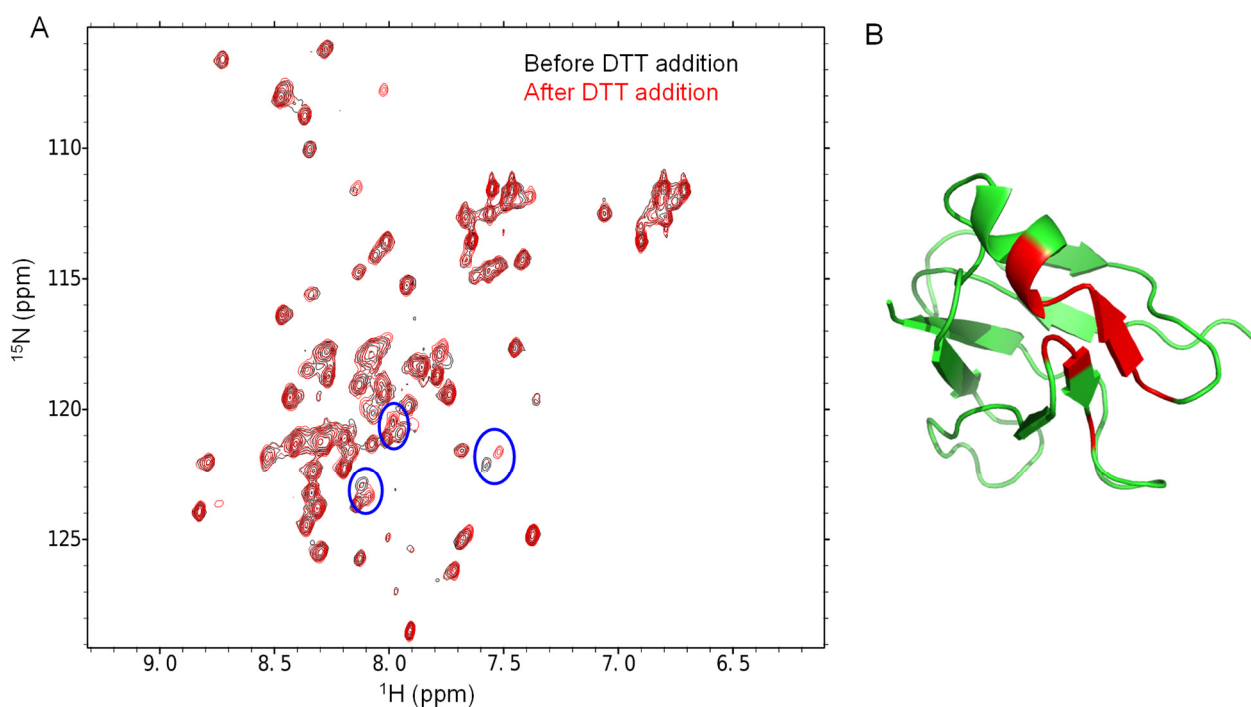

**Figure S3. Change of  $^1\text{H}$ - $^{15}\text{N}$  HSQC spectrum upon DTT addition** (A) Superimposition of  $^1\text{H}$ - $^{15}\text{N}$  HSQC spectra of the TDP-43 NTD alternative conformation recorded at 700 MHz and 25 °C before (black) and after (red) the addition of freshly prepared DTT. The blue circles highlight peaks where the second form is highly decreased after DTT addition. (B) Native TDP-43 NTD protein cartoon (pdb 5x4f) showing the residues presenting double forms in the HSQC spectrum that are not affected by DTT addition coloured in red.

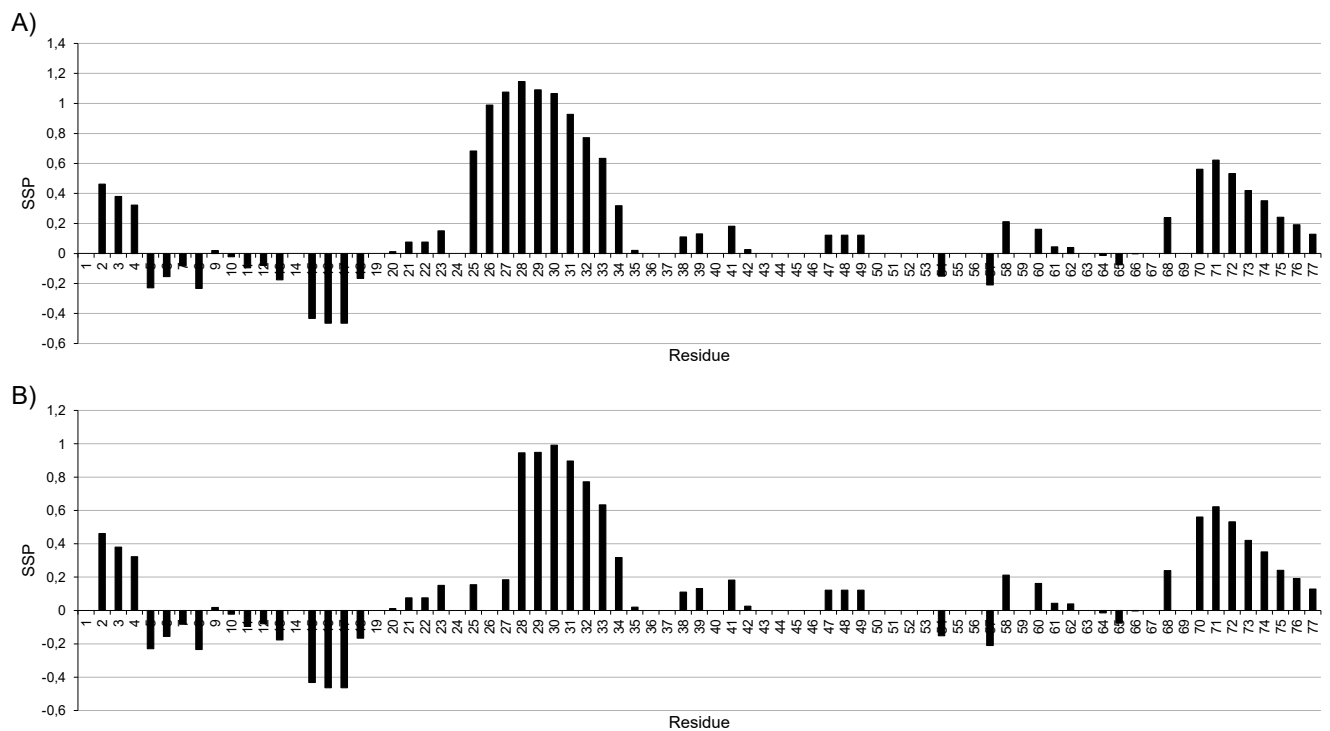

**Figure S4. SSP analysis of alternative TDP-43 NTD conformation for both form A (A) and form B (B).** SSP indicates the tendency to adopt secondary structure (SSP > 0 corresponds to  $\alpha$ -helix, SSP < 0 corresponds to  $\beta$ -strand). A SSP score of  $\pm 1$  corresponds to fully formed secondary structure, while an intermediate SSP value indicate a propensity for those residues to adopt the corresponding secondary structure.

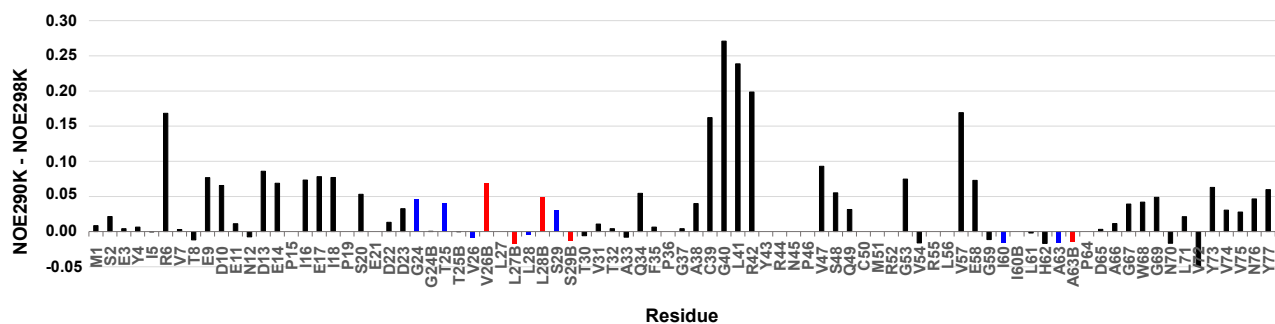

**Figure S5. Difference between NOE values found at different temperature values.** The differences were obtained at 17 °C (290 K) and 25 °C (298 K) for the TDP-43 NTD alternative form in 3% (w/v) SB3-10. The black, blue and red bars correspond to both forms, form A and form B, respectively.



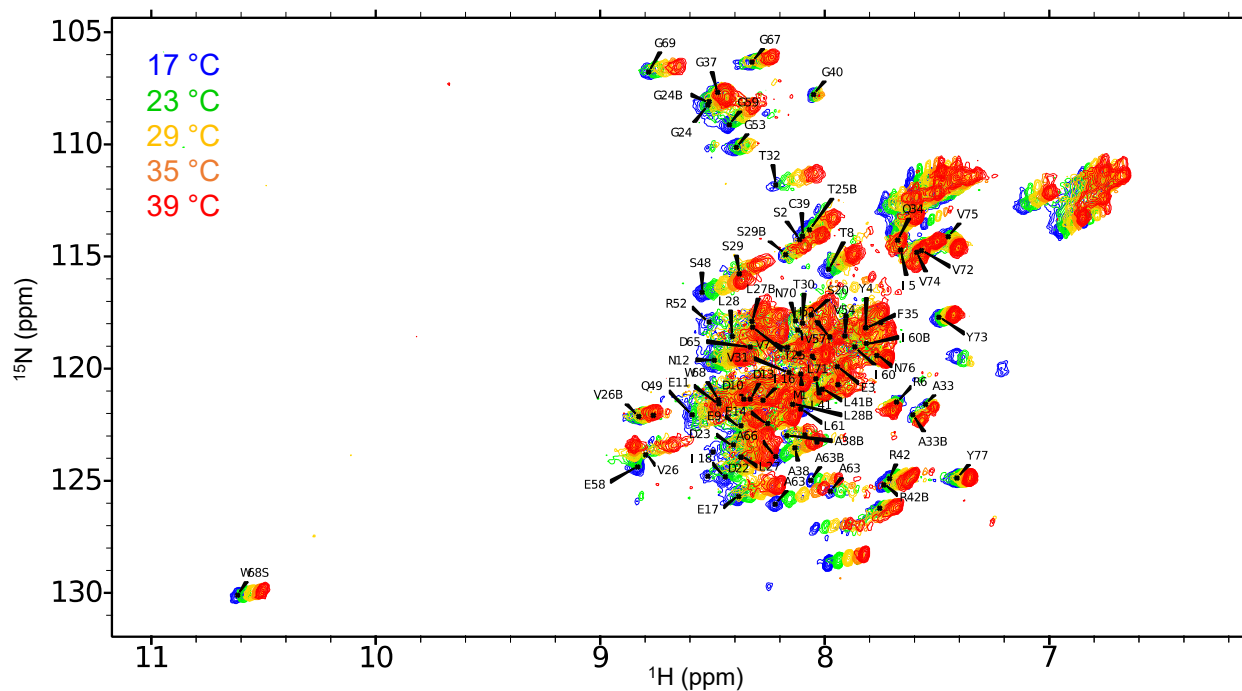

**Figure S6. Overlay of  $^1\text{H}$ - $^{15}\text{N}$  HSQC spectra of TDP-43 NTD.** Spectra are in 3% (w/v) SB3-10 recorded at 700 MHz at different temperatures: 17 °C (blue), 23 °C (green), 29 °C (yellow), 35 °C (orange) and 39 °C (red).

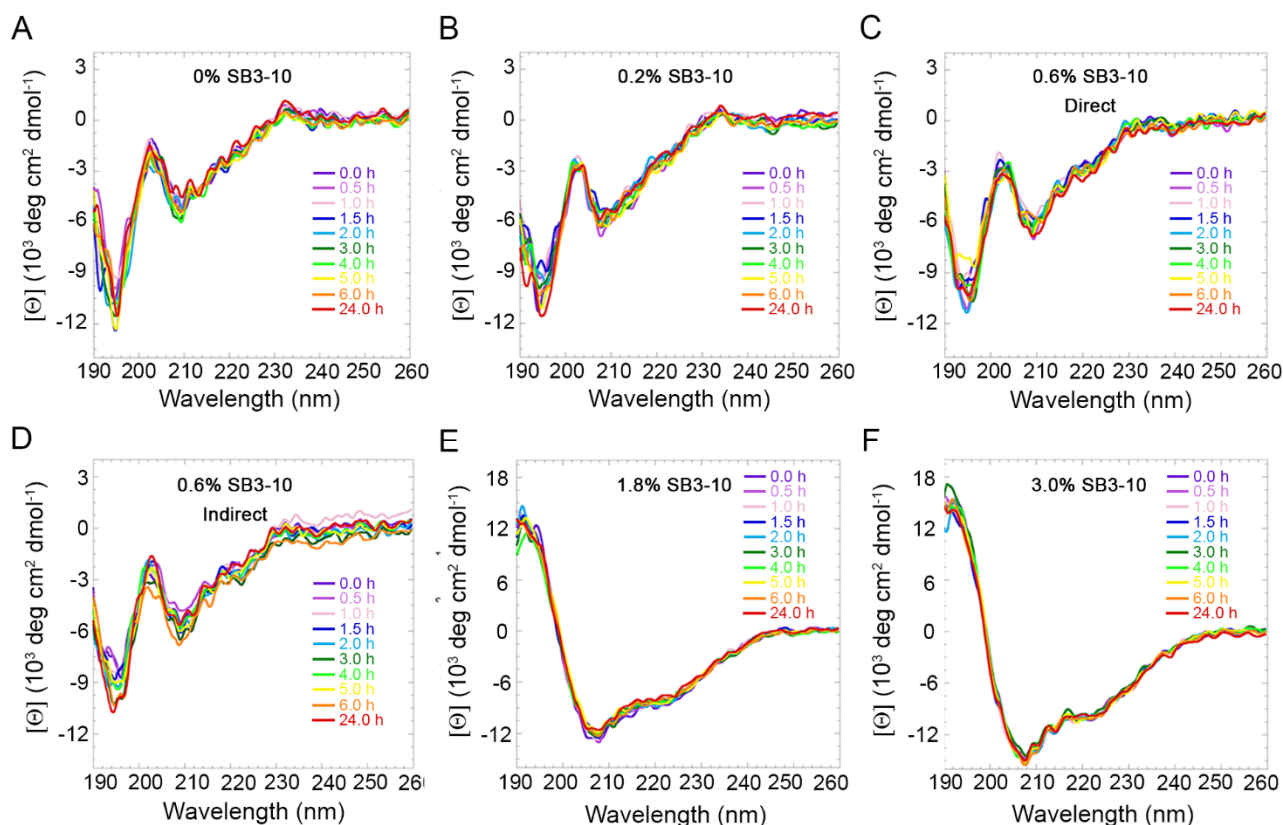

**Figure S7. Aggregation kinetics of TDP-43 NTD at different SB3-10 percent concentrations monitored with far-UV CD.** Far-UV CD spectra of TDP-43 NTD (0.5 mg/ml, 45  $\mu$ M) in 5 mM sodium phosphate buffer, 50 mM NaCl, 1 mM DTT, pH 7.4, 25  $^{\circ}$ C, in the presence of 0.0% (w/v) SB3-10 (A), 0.2% (w/v) SB3-10 (B), 0.6% (w/v) SB3-10 (C,D), 1.8% (w/v) SB3-10 (E), 3.0% (w/v) SB3-10 (F), at the indicated time points. In panel D TDP-43 NTD was pre-incubated in 1.8% (w/v) SB3-10 for 1 h and then diluted to 0.6% (w/v) SB3-10 at the same final conditions as in panel C.

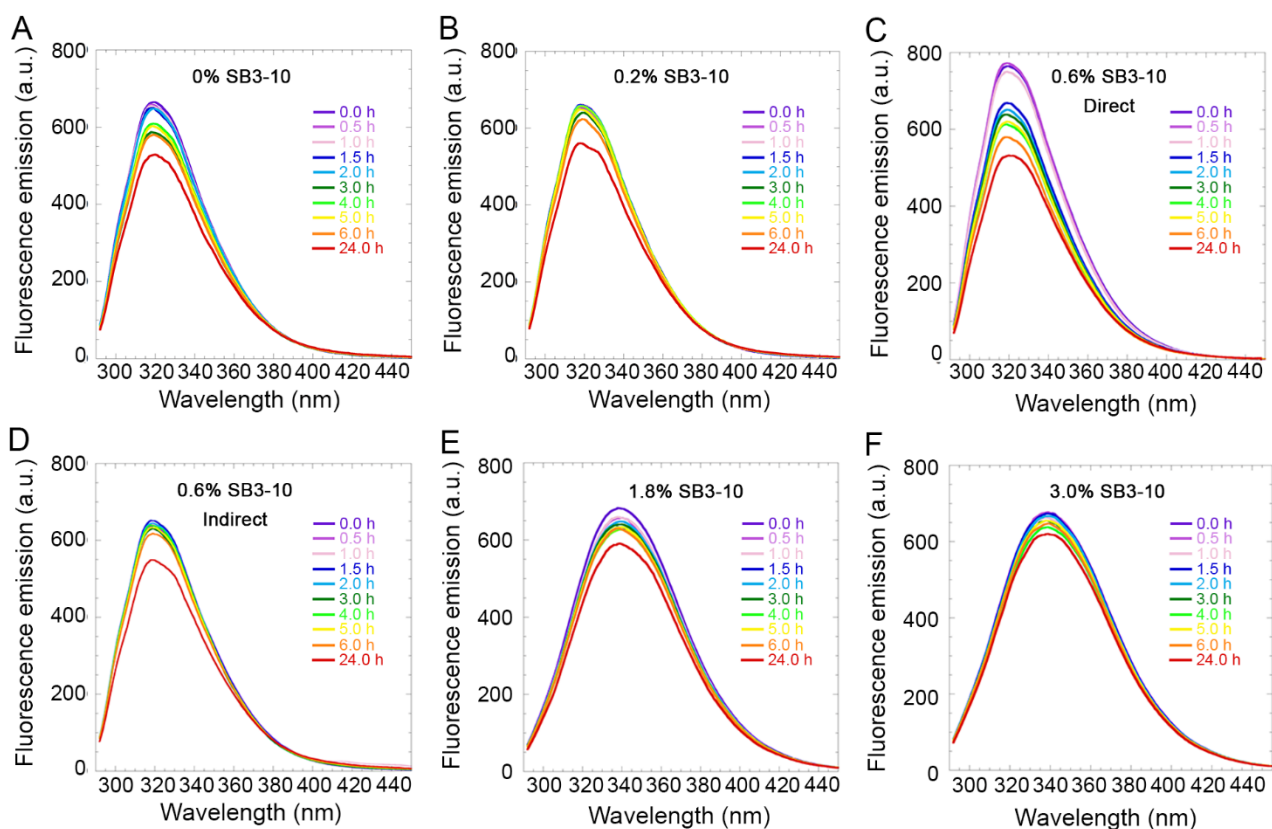

**Figure S8. Aggregation kinetics of TDP-43 NTD at different SB3-10 percent concentrations monitored with intrinsic fluorescence.** Intrinsic Fluorescence spectra of TDP-43 NTD (0.5 mg/ml, 45  $\mu$ M) in 5 mM sodium phosphate buffer, 50 mM NaCl, 1 mM DTT, pH 7.4, 25  $^{\circ}$ C, in the presence of 0.0% (w/v) SB3-10 (**A**), 0.2% (w/v) SB3-10 (**B**), 0.6% (w/v) SB3-10 (**C,D**), 1.8% (w/v) SB3-10 (**E**), 3.0% (w/v) SB3-10 (**F**), at the indicated time points. In panel **D** TDP-43 NTD was pre-incubated in 1.8% (w/v) SB3-10 for 1 h and then diluted to 0.6% (w/v) SB3-10 at the same final conditions as in panel **C**.
